# Supplementary material
Source: PubMed Central journal article supplement (PMC3302966)
Supplement: NIHMS344636-supplement-Supp_Fig_S1-S3.pdf [file NIHMS344636-supplement-Supp_Fig_S1-S3.pdf]

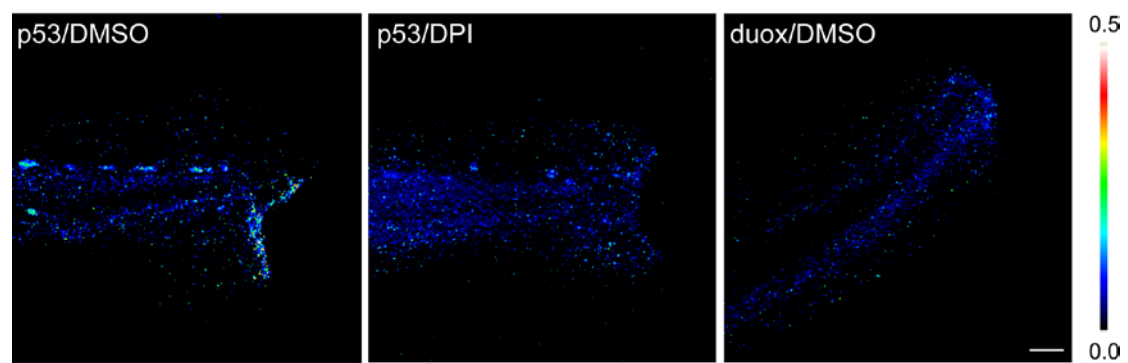

Figure S1. Inhibition of hydrogen peroxide generation by DPI or in duox morphants.

Wild-type AB zebrafish larvae were injected with HyPer mRNA in combination with p53 MO alone or plus duox MO at 1 cell stage. Larvae at 3dpf were pretreated with DPI or DMSO for 1 hr before wounding as indicated. All images were taken 30 min post wounding using the same acquisition parameters and processed with identical post analysis. Note increased YFP488/YFP405 at the wound margin in the p53 morphant treated with DMSO, but not in the one treated with DPI or in the duox morphant treated with DMSO. Scale bar: 40  $\mu$ m.

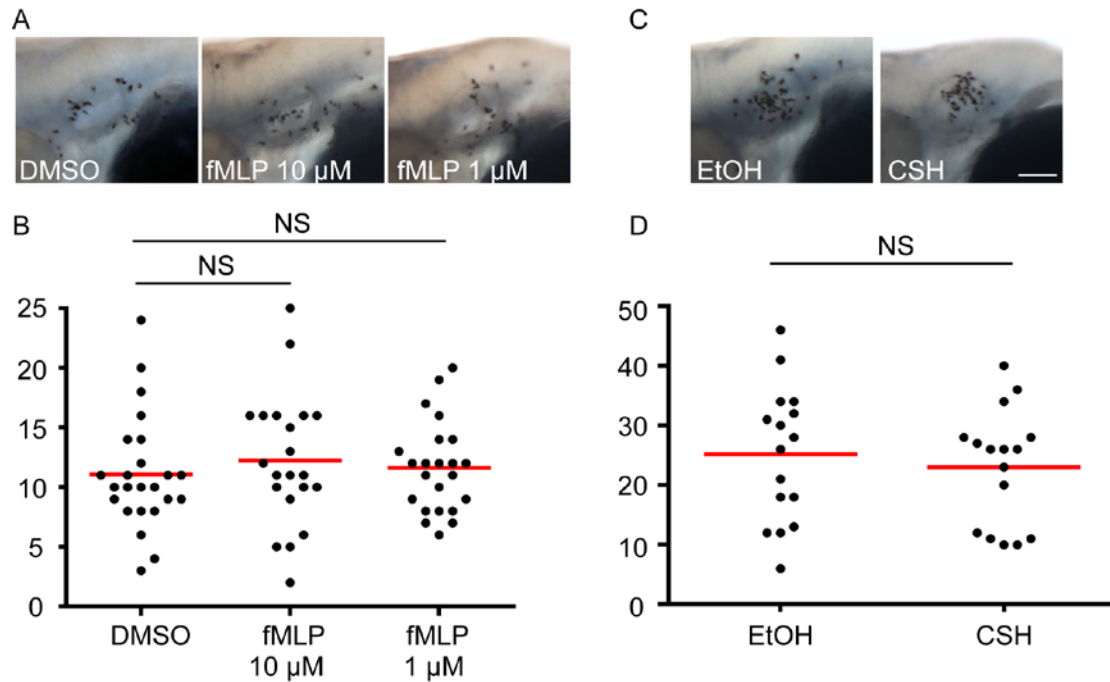

Figure S2. Formyl peptide receptor is not involved in neutrophil recruitment to *Pseudomonas aeruginosa* (PAK) infection.

A) Vehicle control, 10  $\mu$ M or 1  $\mu$ M fMLP were injected into the otic vesicle of 3 dpf wild-type zebrafish larvae. Representative images of neutrophils recruited to ear 1 hour post injection are shown.

B) Quantification of A. n=24 (DMSO), 21 (10  $\mu$ M) and 23 (1  $\mu$ M).

C) Wild-type zebrafish at 3 dpf were treated with vehicle control or 20  $\mu$ M cyclosporine H (CSH) for 1 hr and infected with ~1,200 cfu of PAK (pMKB1::mCherry). Representative images of neutrophils recruited to ear 1 hour post infection are shown.

D) Quantification of C. n=16 (EtOH) and 16 (CSH).

Results are representative of 3 independent experiments. NS, none significant, two-tailed Mann-Whitney test. Scale bar: 50  $\mu$ m.

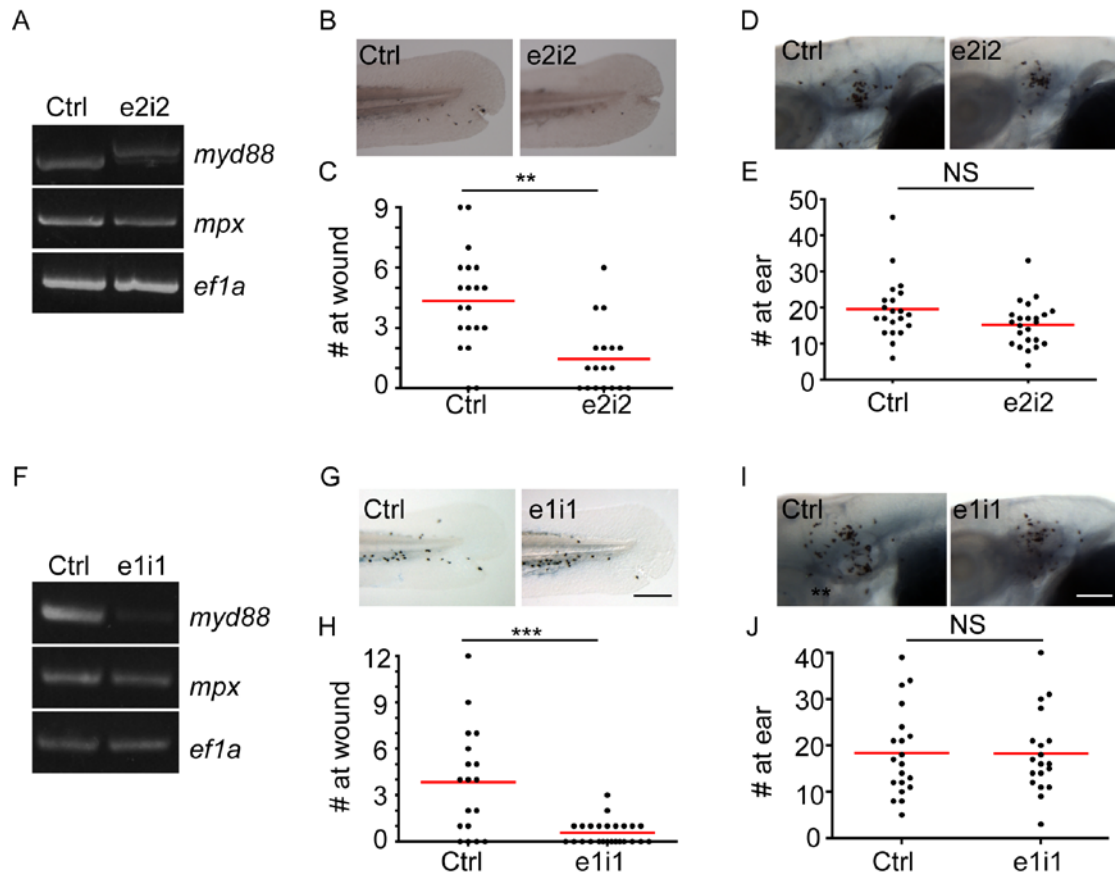

Figure S3. Myd88 is involved in neutrophil recruitment to wounding, but not to *Pseudomonas aeruginosa* (PAK) infection.

A-E) Wild-type AB zebrafish larvae were injected with standard control or *myd88* (*e2i2*) morpholino oligonucleotide at 1 cell stage.

A) RT-PCR of *myd88*, *mpx* or *ef1a* from DNA extracted from control or *myd88* morphants at 3 dpf.

B) At 3 dpf, control or *myd88* morphants were fixed 1 hpf. Representative images of neutrophils recruited to wounds are shown.

C) Quantification of B. n=21 (Ctrl), 23 (*e2i2*).

D) At 3 dpf, Control or *myd88* morphants were fixed 1 hpi with ~1,200 cfu of PAK (pMKB1::mCherry). Representative images of neutrophils recruited to ear are shown.

E) Quantification of D. n=20 (Ctrl), 18 (*e2i2*).

D-F) Similar experiments were performed with another *myd88* morpholino oligonucleotide *e1i1*. n=24 (Ctrl), 23 (*e1i1*) in H. n=16 (Ctrl), 16 (*e1i1*) in J.

Results are representative of 3 independent experiments. \*\*\*,  $p < 0.001$ ; \*\*,  $p < 0.01$ ; NS, none significant, two-tailed Mann-Whitney test.

## Supplemental Movie legend

Movie S1. Absence of H<sub>2</sub>O<sub>2</sub> burst at localized PAK infection.

Wild-type AB zebrafish embryo were injected with HyPer mRNA at 1 cell stage. Embryos at 3 dpf were infected with ~ 1,400 cfu of PAK (pMKB1::mCherry) at the left ear and real-time ratiometric imaging was performed to measure relative amount of H<sub>2</sub>O<sub>2</sub> generated in tissue. The right ear of the same fish was then wounded and generation of H<sub>2</sub>O<sub>2</sub> was monitored under the same conditions. Scale bar: 50 µm.

Movie S2. Differential sensitivity to DPI during neutrophil response to simultaneous wounding and infection.

*Tg(mpx:Dendra2)* at 3 dpf were treated with DMSO, DPI or LY for 1 h, then infected with ~ 1,200 cfu of PAK (pMKB1::mCherry) immediately followed by tail transection. Movies are representative for 8 movies for each condition from 4 separate experiments.
